# Supplementary material for: CARbodies: Human Antibodies Against Cell Surface Tumor Antigens Selected From Repertoires Displayed on T Cell Chimeric Antigen Receptors
Source: PubMed Central journal article supplement — Mol Ther Nucleic Acids. 2013 May 21;2(5):e93–. doi: 10.1038/mtna.2013.19 (PMC4817937; doi:10.1038/mtna.2013.19), 2013-05-21
Supplement: mtna201319x4.pdf [file mtna201319x4.pdf]

**TABLE S1. OLIGONUCLEOTIDES USED FOR LIBRARY CONSTRUCTION AND SEQUENCING**

| NAME | SEQUENCE (5'-3')              |
|------|-------------------------------|
| 1    | GCTAGCCAGRTGCAGCTGCTGCARTCTGG |
| 2    | GCTAGCSAGGTCCAGCTGCTRCAGTCTGG |
| 3    | GCTAGCCAGRTCACCTTGAAGGAGTCTGG |
| 4    | GCTAGCSAGGTGCAGGTGGTGGAGTCTGG |
| 5    | GCTAGCGAGGTGCAGCTGGTGGAGWCYGG |
| 6    | GCTAGCCAGGTGCAGCTACAGCAGTGGGG |
| 7    | GCTAGCCAGSTGCAGCTGCAGGAGTCSGG |
| 8    | GCTAGCGARGTGCAGCTGGTGCAGTCTGG |
| 9    | GCTAGCCAGGTACAGCTGCAGCAGTCAGG |
| 10   | CTATGCGGCCCCATTCA             |
| 11   | GGGGCCCACTCCGACTACAAAGACG     |
| 12   | CAGGCCAAAGCTCTGTGCCTCTGTA     |
| 13   | GTAAAACGACGGCCAGT             |
| 14   | ACAGGAACCAGCTATGACCATGAT      |
| 15   | CATGGCCGCTAGCTGTACAGATATCGC   |
| 16   | GGCCGCGATATCTGTACAGCTAGCGGC   |
