# Supplementary material for: CARbodies: Human Antibodies Against Cell Surface Tumor Antigens Selected From Repertoires Displayed on T Cell Chimeric Antigen Receptors
Source: PubMed Central journal article supplement — Mol Ther Nucleic Acids. 2013 May 21;2(5):e93–. doi: 10.1038/mtna.2013.19 (PMC4817937; doi:10.1038/mtna.2013.19), 2013-05-21
Supplement: mtna201319x5.pdf [file mtna201319x5.pdf]

**TABLE S2. LENTIVIRAL VECTORS**

| LENTIVIRUS                                            | TRANSFER VECTOR PLASMID                   |
|-------------------------------------------------------|-------------------------------------------|
| LV <sup>EGFP</sup>                                    | PRRL.IRES.EGFP                            |
| LV <sup><math>\alpha</math>CEA.CAR</sup>              | PRRL. $\alpha$ CEA.TCR $\zeta$ .IRES.EGFP |
| LV <sup><math>\alpha</math>CEA.CAR<sup>V2</sup></sup> | PRRL. $\alpha$ CEA.CAR <sup>V2</sup>      |
| LV <sup>S2.10.CAR<sup>V2</sup></sup>                  | PRRLS2.10.CAR <sup>V2</sup>               |
| LV <sup>S3.45.CAR<sup>V2</sup></sup>                  | PRRLS3.45.CAR <sup>V2</sup>               |
| LV <sup>S3.97.CAR<sup>V2</sup></sup>                  | PRRLS3.97.CAR <sup>V2</sup>               |
| LV <sup>S3.109.CAR<sup>V2</sup></sup>                 | PRRLS3.109.CAR <sup>V2</sup>              |
| LV <sup>GRIFFIN.CAR</sup>                             | PRRL.GRIFFIN.CAR                          |

<sup>A</sup>TRANSFER VECTOR PLASMIDS USED IN THE COTRANSFECTION FOR THE GENERATION OF THE LENTIVIRAL VECTORS
