# Supplementary material for: CARbodies: Human Antibodies Against Cell Surface Tumor Antigens Selected From Repertoires Displayed on T Cell Chimeric Antigen Receptors
Source: PubMed Central journal article supplement — Mol Ther Nucleic Acids. 2013 May 21;2(5):e93–. doi: 10.1038/mtna.2013.19 (PMC4817937; doi:10.1038/mtna.2013.19), 2013-05-21
Supplement: mtna201319x6.pdf [file mtna201319x6.pdf]

**Table S3. V gene usage and deduced amino acid sequences of CDR3 of unselected Griffin.CAR library**

| Clone No | VH Family | VH Gene                                            | VH CDR3      | VL Family | VL Gene                            |
|----------|-----------|----------------------------------------------------|--------------|-----------|------------------------------------|
| 31       | VH1       | DP-3+IGHV1-f*01                                    | YNLL         | VL1       | V1-16, IGLV1-44*01                 |
| 70       | VH1       | DP-1/HC15-1                                        | ELVGSNCYTFDV | VL1       | V1-16, IGLV1-44*01                 |
| 42       | VH3       | DP-39/HC16-8                                       | LESLPFDY     | VL1       | IGLV1-41*01                        |
| 110      | VH1       | VP-75/VI-2...+, VH1-2, IGHV1-2*02                  | NLWW         | VL1       | IGLV1-47*01                        |
| 26       | VH1       | DP-4/VH1.45+IGHV1-45*02                            | KATTIP-GNRWP | VL1       | VL1-18, IGLV1-50*01                |
| 109      | VH1       | DP-1/HC15-1                                        | TCSQTS       | VL3       | V2-1, IGLV3-1*01                   |
| 29       | VH1       | DP-2/V71-5+, IGHV1-58*01                           | SAIATSL      | VL1       | IGLV1-47*01                        |
| 2        | VH1       | DP-2/V71-5+, IGHV1-58*01                           | VIKEP        | VL3       | V2-13, IGLV3-19*01                 |
| 17       | VH5       | V186.2, 186.2, VHJ558, J558.75.177, IGHV152*01     | YDYYGSSSFDY  | VL3       | V2-13, IGLV3-19*01                 |
| 68       | VH7       | VI-4.1b+, IGHV7-4-1*02                             | EDLHDVASN    | VL3       | V2-13, IGLV3-19*01                 |
| 76       | VH1       | COS-14/HC15-5                                      | EAAPFPPX     | VL3       | V2-13, IGLV3-19*01                 |
| 85       | VH6       | IGHV6                                              | RLILS        | VL3       | L25, IGKV3/OR2-268*02, IGKV3D-7*01 |
| 93       | VH1       | DP10/hv1051...+, IGHV1-69*01                       | IWSTLRGSL    | VL2       | V1-4, IGLV2-14*01                  |
| 107      | VH1       | DP-75/VI2...+, VH1-2, IGHV1-2*02                   | CVAPTDK      | VL2       | V1-4, IGLV2-14*01                  |
| 12       | VH1       | DP-5/VI-24P+, VH1-24, IGHV1-24*01                  | NRSRTK       | VL2       | V1-4, IGLV2-14*01                  |
| 32       | VH1       | DP-2/V71-5+, IGHV1-58*01                           | LFTNPC       | VL1       | V1-11, IGLV1-36*01                 |
| 111      | VH1       | DP-1/HC15-1                                        | ARIFT        | VL1       | V1-11, IGLV1-36*01                 |
| 52       | VH1       | DP-25/VI-3b+, IGHV1-3*01                           | RPAHFQ       | VL1       | V1-11, IGLV1-36*01                 |
| 55       | VH1       | DP-25/VI-3b+, IGHV1-3*01                           | RPAHFQ       | VL1       | V1-11, IGLV1-36*01                 |
| 16       | VH1       | DP-3+IGHV1-f*01                                    | PAHNILA      | VL9       | IGLV9-49*01                        |
| 13       | VH4       | DP-71/3d197d...+, VH4-59, IGHV4-59*09, IGHV4-59*01 | ASPQVFDY     | VL9       | IGLV9-49*01                        |
| 40       | VH1       | DP-1/HC15-1                                        | VLSEA        | VL9       | IGLV9-49*01                        |
| 28       | VH1       | DP-2/V71-5+, IGHV1-58*01                           | LQNKGM       | VL2       | A2, IGKV2D-29*01                   |
| 35       | VH1       | DP-5/VI-24P+, VH1-24, IGHV1-24*01                  | FICS         | VL2       | A2, IGKV2D-29*01                   |
| 25       | VH1       | DP-14/V1-18+, VH1-18, IGHV1-18*01                  | LFRQGF       | VL1       | 04, 014, IGKV1D-37*01              |
| 14       | VH1       | DP-3+IGHV1-f*01                                    | TRVNRVVL     | VL2       | IGKV2                              |
| 84       | VH1       | DP-4/VH1.45+IGHV1-45*02                            | LDNYQYN      | VL2       | A3, A19, IGKV2D-28*01, IGKV2-28*01 |
| 103      | VH5       | V186.2, 186.2, VHJ558, J558.75.177, IGHV152*01     | YDYYGSSSFDY  | VL2       | A2, IGKV2D-29*01                   |
| 79       | VH1       | VH1-58, IGHV1-58*02                                | ARWA         | VL2       | 011, 01, IGKV2D-40*01, IGKV2-40*01 |
| 100      | VH1       | DP-75/VI2...+, VH1-2, IGHV1-2*02                   | RSVAGDSKV    | VL2       | A3, A19, IGKV2D-28*01, IGKV2-28*01 |
| 94       | VH1       | DP-14/V1-18+, VH1-18, IGHV1-18*01                  | STHSGDIC     | VL1       | L5, IGKV1-12*02, IGKV1-12*01       |
| 106      | VH1       | DP-14/V1-18+, VH1-18, IGHV1-18*01                  | STHSGDIC     | VL1       | L5, IGKV1-12*02, IGKV1-12*01       |
| 64       | VH7       | VI-4.1b+, IGHV7-4-1*02                             | NYLGTR       | VL1       | L19, IGKV1D-12*01                  |
| 62       | VH1       | DP-1/HC15-1                                        | SNFTTLTIREL  | VL1       | L24, IGKV1D-8*01                   |
| 96       | VH1       | DP-10, hv1051...+, IGHV1-69*01                     | TPDNFDYR     | VL1       | L24, IGKV1D-8*01                   |
| 97       | VH3       | V3-53+, VH3-53, IGHV3-53*01                        | SIVRHGLVNTLW | VL1       | L24, IGKV1D-8*01                   |
| 95       | VH7       | VI-4.1b+, IGHV7-4-1*02                             | LGPLNT       | VL4       | B3, IGKV4-1*01                     |
| 69       | VH1       | DP-2/V71-5+, IGHV1-58*01                           | LSQNGSSG     | VL1       | VL1, IGLV1*01                      |
| 99       | VH7       | VHSM7.a4.108, IGHV14-4*02                          | GTPTGPYYFDY  | VL4       | 76con, 4-56, ap4, IGKV4-57*01      |
| 21       | VH7       | VI-4.1b+, IGHV7-4-1*02                             | RNSSE        | VL4       | V5-1, IGLV4-3*01                   |
| 81       | VH7       | VI-4.1b+, IGHV7-4-1*02                             | APSLMQP      | VL1       | V1-11, IGLV1-36*01                 |
| 30       | VH6       | IGHV6                                              | LHL          | VL2       | A7, IGKV2D-24*01                   |
| 65       | VH6       | IGHV6                                              | ITYGVFDY     | VL3       | L25, IGKV3/OR2-268*02, IGKV3D-7*01 |

|    |     |                                                  |            |     |                                |
|----|-----|--------------------------------------------------|------------|-----|--------------------------------|
| 24 | VH4 | IGHV6                                            | GMEPSFDY   | VL3 | V2-1, IGLV3-1*01               |
| 10 | VH6 | IGHV6                                            | VLPREFDY   | VL1 | IGLV1-47*01                    |
| 98 | VH6 | IGHV6                                            | RVTMCFDC   | VL2 | V1-9, IGLV2-33*01              |
| 63 | VH4 | VH5/4d76...+DP-63/VH4-21...+, VH4-34, VGH4-34*01 | SGTHRP     | VL1 | IGLV1-40*02                    |
| 71 | VH4 | DP-66/V71-2...+, IGHV4-61*07, IGHV4-61*01        | S-LTQP     | VL2 | V1.4, IGLV2-14*01              |
| 47 | VH3 | DP-39/HC16-8                                     | IGGPA      | VL1 | IGLV1-41*01                    |
| 23 | VH4 | IGHV4                                            | SPDALYC    | VL3 | V2-13, IGLV3-19*01             |
| 72 | VH3 | DP-45                                            | TCHSGWPLAH | VL2 | V1-7, IGLV2-23*03, IGLV2-23*01 |
| 91 | VH3 | V3-53+, VH3-53, IGHV3-53*01                      | IIPVCDFKWR | VL1 | V1-11, IGLVI-36*01             |

| <b>VL CDR3</b> | <b>N° repetitions</b> |
|----------------|-----------------------|
| AAWDDSLYRRFV   | 0                     |
| AAWDDSLSPV     | 0                     |
| AAWDDSLV       | 0                     |
| AAWDDSL SAYV   | 0                     |
| KAWDNSLV       | 0                     |
| QAWDSRTSPV     | 0                     |
| AAWDNSLCV      | 0                     |
| NSRDSSGGWGTV   | 0                     |
| NSRDSSGNHV     | 0                     |
| NSRGSSGFMFV    | 0                     |
| NSRXSSGTV      | 0                     |
| SLYSSSYWQV     | 0                     |
| SPYTSSSYS AV   | 0                     |
| SSYTSSSV       | 0                     |
| SSYTSSSV       | 0                     |
| AAWDDSLSF AV   | 0                     |
| AASTOPDDSLV    | 0                     |
| AAWDDSLGRV     | 0                     |
| AAWDDSLXRV     | 0                     |
| GADHGSGSNFLV   | 0                     |
| GADHGSGSNFSV   | 0                     |
| GADHGSGSNFHV   | 0                     |
| TQSIQLHAT      | 0                     |
| MQSIQLLM       | 0                     |
| QRTYNAQT       | 0                     |
| MQMHKIILR      | 0                     |
| MQALQTPT       | 0                     |
| MQSIQLRQVT     | 0                     |
| MQATQFHQAT     | 0                     |
| MQALQTRT       | 0                     |
| QQANSFRT       | 0                     |
| QQANSFRT       | 0                     |
| LQDYN YLT      | 0                     |
| QQYGSRT        | 0                     |
| QQYYSFLSRT     | 0                     |
| QQYYS          | 0                     |
| QQYYSTPPIT     | 0                     |
| ALWYSNHV       | 0                     |
| QQRSSYPLT      | 0                     |
| GERHTIDGQVV    | 0                     |
| AAWDDSLSPSCV   | 0                     |
| TQATQFLSST     | 0                     |
| QQDYNLPT       | 0                     |

|             |   |
|-------------|---|
| AAWDDSLSV   | 0 |
| AAWDDSLYV   | 0 |
| SLYSSSYV    | 0 |
| QSYDSSLSSV  | 0 |
| SLYKQHC     | 0 |
| LAWDTSPRDTV | 0 |
| NSRDSSGTV   | 0 |
| CSYAGSSFVW  | 0 |
| AAWDDSLAPMV | 0 |
