# Supplementary material for: CARbodies: Human Antibodies Against Cell Surface Tumor Antigens Selected From Repertoires Displayed on T Cell Chimeric Antigen Receptors
Source: PubMed Central journal article supplement — Mol Ther Nucleic Acids. 2013 May 21;2(5):e93–. doi: 10.1038/mtna.2013.19 (PMC4817937; doi:10.1038/mtna.2013.19), 2013-05-21
Supplement: mtna201319x7.pdf [file mtna201319x7.pdf]

**Table S4. V gene usage and deduced aminoacid sequences of CDR3 after one round of activation/selection on HeLa cells.**

| Clone num | VH Family | VH Gene                                                         | VH CDR3      | VL Family | VL Gene                            | VL CDR3         | N° repetition |
|-----------|-----------|-----------------------------------------------------------------|--------------|-----------|------------------------------------|-----------------|---------------|
| 35        | VH1       | hv1f10t, DP7/21-2...+, VH1-46, IGHV1-46*03, IGHV1-46*01         | CLRD         | VL2       | 011, 01, IGKV2D-40*01, IGKV2-40*01 | MQRIEFRRT       | 0             |
| 67        | VH1       | DP-14/V1-18+, VH1-18, IGHV1-18*01                               | SDGFMPGARSWK | VL2       | 011, 01, IGKV2D-40*01, IGKV2-40*01 | MQRIEFRLLT      | 0             |
| 119       | VH1       | DP-14/V1-18+, VH1-18, IGHV1-18*01                               | VDPLSW       | VL2       | V1-9, IGLV2-33*01                  | SLYSSIYS        | 0             |
| 69        | VH1       | DP-15/V1-8+, VH1-18, IGHV1-18*01                                | DTML         | VL2       | A3, A19, IGKV2D-28*01, IGKV2-28*01 | MQALQTRT        | 0             |
| 25        | VH1       | DP-3+, IGHV1-f*01                                               | STVRV        | VL2       | A7, IGKV2D-24*01                   | TQATQFHCT       | 0             |
| 135       | VH1       | DP-3+, IGHV1-f*01                                               | NAMWQW       | VL3       | A27, IGKV3-20*01                   | QQYGSST         | 0             |
| 75        | VH5       | DP-73/V5-51...+, VH5-51, IGHV5-51*01                            | LTPPHL       | VL2       | A2, IGKV2D-29*01                   | MQSIQLPVGT      | 0             |
| 146       | VH1       | DP-14/V1-18+, VH1-18, IGHV1-18*01                               | RVKHTW       | VL2       | A17, IGKV2-30*01                   | MQGTHWRVFT      | 2             |
| 4         | VH5       | DP-73/V5-51...+, VH5-51, IGHV5-51*01                            | DGQWGIEW     | VL3       | V2-13, IGLV3-19*01                 | NSRDSSG-V       | 0             |
| 102       | VH3       | DP31/V3-9P...+VH3-9, IGHV3-9*01                                 | AASTSTA      | VL3       | V2-13, IGLV3-19*01                 | NSRDSSG-V       | 0             |
| 114       | VH1       | DP-25/VI-3b, IGHV1-3*01                                         | SSAPR        | VL3       | V2-13, IGLV3-19*01                 | NSRDSSGYV       | 0             |
| 145       | VH1       | DP-75/VI-2...+, VH1-2, IGHV1-2*02                               | NQWKKWW      | VL3       | V2-13, IGLV3-19*01                 | NSRDSSG-TV      | 2             |
| 58        | VH1       | DP-1/HC15-1                                                     | VGRS         | VL8       | V3-4, IGLV8-61*01                  | VLYMGSGV        | 2             |
| 47        | VH1       | DP-5/VH1-24P+VH1-24, IGHV1-24*01                                | PSCV         | VL4       | V5-1, IGLV4-3*01                   | GESHTIDGQVDV    | 0             |
| 55        | VH1       | DP-4+, VH1-45, IGHV1-45*02                                      | GFDMLKE      | VL4       | V5-1, IGLV4-3*01                   | GESHTIDGQVQV    | 0             |
| 79        | VH1       | DP-1/HC15-1                                                     | EPPGWE       | VL4       | V5-1, IGLV4-3*01                   | GESHTIDGQVVF    | 2             |
| 108       | VH1       | hv1f10t, DP7/21-2...+, VH1-46, IGHV1-46*03, IGHV1-46*01         | PLVRP        | VL4       | V5-1, IGLV4-3*01                   | GESHTIDGQVVY    | 0             |
| 53        | VH1       | DP-14/V1-18+, VH1-18, IGHV1-18*01                               | WWMARKL      | VL4       | V5-1, IGLV4-3*01                   | GESHTIDGQVVF    | 0             |
| 9         | VH6       | IGHV6                                                           | LIREW        | VL1       | V1-11, IGLV1-36*01                 | AAWDDSLLGIV     | 0             |
| 111       | VH6       | IGHV6                                                           | TDNWL        | VL3       | V2-13, IGLV3-19*01                 | KAWDNRLVSV      | 0             |
| 132       | VH6       | IGHV6                                                           | FIPQTFDYW    | VL3       | V2-13, IGLV3-19*01                 | TPGTAVVTMYSAEGP | 0             |
| 59        | VH6       | IGHV6                                                           | PGWAN        | VL2       | 011, 01, IGKV2D-40*01, IGKV2-40*01 | MQRIEFPT        | 0             |
| 131       | VH6       | IGHV6                                                           | NTHTRFDYW    | VL1       | 04, 014, IGKV1D-37*01, IGKV1-37*01 | QRTYNAHHG       | 2             |
| 112       | VH6       | IGHV6                                                           | GGAQQFDY     | VL1       | L24, IGKV1D-8*01                   | QQYYSFQTRP      | 0             |
| 34        | VH3       | IGHV3                                                           | FMRHT        | VL1       | V1-11, IGLV1-36*01                 | AAWDDSLLV       | 0             |
| 83        | VH3       | DP-45                                                           | TCHSGWPLAH   | VL2       | V1-7, IGLV2-23*03, IGLV2-23*01     | CSYAGSSFWV      | 0             |
| 121       | VH4       | VH5/4d76...+, DP-63/VH4.21...+, VH4-34, IGHV4-34*01             | NTHTRFDYW    | VL2       | V1-7, IGLV2-23*03, IGLV2-23*01     | QRTYNAHHG       | 0             |
| 2         | VH1       | DP-1/HC15-1                                                     | QDL          | VL1       | V1-17, IGLV1-47*02                 | AAWDDSLQTV      | 3             |
| 45        | VH5       | DP-73/V5-51...+, VH5-51, IGHV5-51*01                            | HATSGK       | VL1       | V1-18, IGLV1-50*01                 | KAWDNSLV        | 0             |
| 40        | VH1       | DP-10/HV1051...+, IGHV1-69*01                                   | WTHRQVGNVT   | VL1       | V1-11, IGLV1-36*01                 | AAWDDSLV        | 0             |
| 140       | VH1       | DP-10/hv1051...+, IGHV1-69*01                                   | LYPPTW       | VL1       | V1-16, IGLV1-44*01                 | AAWDDRL         | 0             |
| 37        | VH1       | hv1f10t, DP7/21-2...+, VH1-46, IGHV1-46*03, IGHV1-46*01         | PPNLRCNS     | VL1       | IGLV1-47*01                        | AAWDDSLSVLV     | 0             |
| 139       | VH1       | hv1f10t, DP-7/21-2...+, VH1-46, IGHV1-46*03, IGHV1-46*01        | LKQQWDQHWLW  | VL1       | L24, IGKV1D-8*01                   | QQYYSFQCA       | 0             |
| 65        | VH1       | DP-75/VI-2...+, VH1-2, IGHV1-2*02                               | VTGDASF      | VL1       | IGLV1-47*01                        | AAWDDSLV        | 2             |
| 60        | VH1       | DP-4+, VH1-45, IGHV1-45*02                                      | YGNRTN       | VL1       | IGLV1-47*01                        | AAWDDSLV        | 0             |
| 70        | VH1       | DP-14/V1-18+, VH1-18, IGHV1-18*01                               | ITSAS        | VL1       | V1-16, IGLV1-44*01                 | AAWDDSLV        | 0             |
| 91        | VH1       | COS-14/HC15-5                                                   | CEQEM        | VL1       | V1-16, IGLV1-44*01                 | AAWDDSLPVPV     | 0             |
| 133       | VH1       | COS-14/HC15-5                                                   | LWLRCFDYW    | VL3       | V2-1, IGLV3-1*01                   | QAWDDSTTW       | 0             |
| 92        | VH1       | DP-2/V71-5+, IGHV1-58*01                                        | SPNPRGC      | VL1       | IGLV1-47*01                        | AAWDDSLFV       | 0             |
| 61        | VH5       | DP-73/V5-51...+, VH5-51, IGHV5-51*01                            | LVSWSFDY     | VL1       | L8, IGKV1-9*01                     | QLNLSYLT        | 0             |
| 63        | VH5       | DP-73/V5-51...+, VH5-51, IGHV5-51*01                            | PKRTSLSL     | VL7       | IGLV7-46*01                        | LLSYSGAHTV      | 0             |
| 49        | VH1       | DP-14/V1-18+, VH1-18, IGHV1-18*01                               | LFRQGF       | VL1       | 04, 014, IGKV1D-37*01, IGKV1-37*01 | QRTYNAQT        | 0             |
| 56        | VH7       | VI-4.1b+, IGHV7-4-1*01                                          | GRWTCWDTVH   | VL1       | 04, 014, IGKV1D-37*01, IGKV1-37*01 | QRTYNAQT        | 0             |
| 31        | VH1       | DP-10/HV1051...+, IGHV1-69*01                                   | FSTGTFN      | VL1       | L24, IGKV1D-8*01                   | QQYYSFLSST      | 2             |
| 115       | VH1       | DP-25/VI-3b, IGHV1-3*01                                         | RYKHQNIQIC   | VL4       | B3, IGKV4-1*01                     | QQYYSTLTFG      | 2             |
| 24        | VH1       | VH1-58, IGHV1-58*02                                             | ARWA         | VL2       | 011, 01, IGKV2D-40*01, IGKV2-40*01 | LHNFTRLRSA      | 0             |
| 16        | VH1       | DP-14/V1-18+, VH1-18, IGHV1-18*01                               | APREA        | VL3       | A11, IGKV3D-20*01                  | MVAHTLLRSA      | 0             |
| 28        | VH4       | DP-68/1.9I...+ 4.42/VH4.13..., VH4-28, IGHV4-28*03, IGHV4-28*03 | REVIY        | VL1       | L24, IGKV1D-8*01                   | QQYYSHFVRS      | 0             |
| 130       | VH3       | DP-48/13-2+, VH3-13, IGHV3-13*01                                | WEYTAW       | VL1       | 08, 018, IGKV1D-33*01, IGKV1-33*01 | QQYDNL          | 0             |
| 120       | VH1       | DP-75/VI-2...+, VH1-2, IGHV1-2*02                               | SSRSEIW      | VL1       | 08, 018, IGKV1D-33*01, IGKV1-33*01 | QQYDNL          | 0             |
| 136       | VH1       | DP-75/VI-2...+, VH1-2, IGHV1-2*02                               | NQWKKWW      | VL3       | L25, IGKV3/OR2-268*02, IGKV3D-7*01 | QQYDNLH         | 0             |
| 141       | VH4       | DP-66/V71-2...+, IGHV4-61*07, IGHV4-61*01                       | NRLFVATW     | VL1       | V1-19, IGLV1-51*01                 | GTWDDSSLS       | 0             |
