# Supplementary material for: CARbodies: Human Antibodies Against Cell Surface Tumor Antigens Selected From Repertoires Displayed on T Cell Chimeric Antigen Receptors
Source: PubMed Central journal article supplement — Mol Ther Nucleic Acids. 2013 May 21;2(5):e93–. doi: 10.1038/mtna.2013.19 (PMC4817937; doi:10.1038/mtna.2013.19), 2013-05-21
Supplement: mtna201319x8.pdf [file mtna201319x8.pdf]

Table S5. V gene usage and deduced aminoacid sequences of CDR3 after two round of activation/selection on HeLa cells.

| Clone number | VH Family | VH Gene                                                           | VH CDR3     | VL Family | VL Gene                            | VL CDR3     | N° repetitions |
|--------------|-----------|-------------------------------------------------------------------|-------------|-----------|------------------------------------|-------------|----------------|
| 46           | VH4       | DP-70/4d68...+, IGHV4-4*02                                        | ALHRGE      | VL3       | V2-13, IGLV3-19*01                 | NSRDSSGFV   | 0              |
| 87           | VH1       | DP-5/VI-24P+, VH1-24, IGHV1-24*01                                 | SNFWSX      | VL3       | V2-13, IGLV3-19*01                 | NSRDSSGRNV  | 0              |
| 135          | VH4       | DP-69/4d255...                                                    | EDRC        | VL3       | V2-13, IGLV3-19*01                 | NSRDSSGFVFG | 0              |
| 138          | VH4       | DP-68/1.9IL...+, 4.42/VH4.13..., VH4-28, IGHV4-28*03, IGHV4-28*01 | YGDGMA      | VL3       | V2-13, IGLV3-19*01                 | NSRDSSGFVFG | 0              |
| 10           | VH7       | VI-4.1b+, IGHV7-4-1*02                                            | RSPN        | VL1       | V1-16, IGLV1-44*01                 | AAWDDSLLTAV | 0              |
| 79           | VH7       | VI-4.1b+, IGHV7-4-1*02                                            | EDLHDVASN   | VL3       | V2-13, IGLV3-19*01                 | NSRGSSGFMFV | 0              |
| 133          | VH7       | VI-4.1b+, IGHV7-4-1*02                                            | LNNTYLL     | VL1       | IGLV1-47*01                        | AAWGDSLDRPV | 0              |
| 59           | VH1       | DP-5/VI-24P+, VH1-24, IGHV1-24*01                                 | ALSTYPRRV   | VL1       | V1-16, IGLV1-44*01                 | AAWDDSLV    | 0              |
| 92           | VH1       | DP-1/HC15-1                                                       | GRTSFR      | VL1       | IGLV1-47*01                        | AAWDGLAWAV  | 0              |
| 86           | VH1       | DP-10/hv1051...+, IGHV1-69*01                                     | RAMTMCDE    | VL1       | IGLV1-47*01                        | AAWDDSLPPFV | 0              |
| 109          | VH1       | DP-4, VH1-45, IGHV1-45*02                                         | VLRV        | VL1       | V1-16, IGLV1-44*01                 | AAWDDSLTCV  | 0              |
| 25           | VH5       | DP-73/V5-51...+, VH5-51, IGHV5-51*01                              | ASTRPFDY    | VL2       | V1-9, IGLV2-33*01                  | SLYSSSTLLLY | 0              |
| 76           | VH5       | DP-73/V5-51...+, VH5-51, IGHV5-51*01                              | MPVN        | VL2       | V1-9, IGLV2-33*01                  | SLYSSSYNPLV | 0              |
| 145          | VH1       | DP-3+, IGHV1-f*01                                                 | NTLVCSR     | VL2       | V1-9, IGLV2-33*01                  | SLYSSSYV    | 2              |
| 155          | VH1       | DP-3+, IGHV1-f*01                                                 | SDIVGTH     | VL1       | V1-16, IGLV1-44*01                 | AAWDDSLSSMV | 0              |
| 123          | VH1       | DP-3+, IGHV1-f*01                                                 | PSLHQYL     | VL1       | IGLV1-41*01                        | LAWDTSRPV   | 0              |
| 39           | VH1       | DP-1/HC15-1                                                       | EEPG        | VL4       | V5-1, IGLV4-3*01                   | GESHTIDGGQV | 2              |
| 98           | VH5       | DP-73/V5-51...+, VH5-51, IGHV5-51*01                              | MSLRFDY     | VL9       | IGLV9-49*01                        | RAGHGSGSNFV | 0              |
| 12           | VH5       | DP-73/V5-51...+, VH5-51, IGHV5-51*01                              | YRKR        | VL1       | 08, 018, IGKV1D-33*01, IGKV1-33*01 | QOYDNLPT    | 0              |
| 91           | VH5       | DP-73/V5-51...+, VH5-51, IGHV5-51*01                              | KSMTSRLVN   | VL1       | 02, 012, IGKV1D-39*01, IGKV1-39*01 | QOYSTLT     | 0              |
| 89           | VH5       | DP-73/V5-51...+, VH5-51, IGHV5-51*01                              | GLNLCKE     | VL2       | 011, 01, IGKV2D-40*01, IGKV2-40*01 | MQRIEFPSC   | 0              |
| 71           | VH1       | DP-1/HC15-1                                                       | TASVNMV     | VL2       | IGKV2                              | MQDAQDPT    | 0              |
| 72           | VH1       | DP-3+, IGHV1f*01                                                  | ALLCG       | VL2       | A3, A19, IGKV2D-28*01, IGKV2-28*01 | MQASTNSSST  | 0              |
| 27           | VH1       | DP-75/VI-2...+, VH1-2, IGHV1-2*02                                 | AKGK        | VL9       | IGLV9-49*01                        | GADHGRGATS  | 0              |
| 22           | VH1       | DP-4, VH1-45, IGHV1-45*02                                         | DRNAGLPPYKQ | VL3       | L25, IGKV3/OR2-268*02, IGKV3D-7*01 | QQDYNLS     | 0              |
| 160          | VH1       | DP-4+, VH1-45, IGHV1-45*02                                        | AWPSGAECA   | VL1       | VL1, IGLV1*01                      | MQSIQLLT    | 0              |
| 105          | VH1       | DP-1/HC15-1                                                       | VQEWSFHT    | VL2       | 011, 01, IGKV2D-40*01, IGKV2-40*01 | MQRIF       | 0              |
| 62           | VH1       | DP-2/V71-5+, IGHV1-58*01                                          | TWKHIKFG    | VL2       | A2, IGKV2D-29*01                   | CKMHKILSTO  | 3              |
| 82           | VH5       | DP-73/V5-51...+, VH5-51, IGHV5-51*01                              | LVSWSFDY    | VL1       | L8, IGKV1D-16*01                   | QQLNSYLT    | 0              |
| 102          | VH1       | DP-75/VI-2...+, VH1-2, IGHV1-2*02                                 | YTAMCENV    | VL1       | L15, IGKV1D-16*01                  | QOYNSYRT    | 0              |
| 30           | VH6       | IGHV6                                                             | QPLQT       | VL2       | V1-9, IGLV2-33*01                  | GLYSSSYLMV  | 2              |
| 35           | VH6       | IGHV6                                                             | QHGPRFDY    | VL2       | V1-9, IGLV2-33*01                  | AYIPSRVY    | 0              |
| 3            | VH6       | IGHV6                                                             | KLRSPFDY    | VL1       | V1-16, IGLV1-44*01                 | AAWDDSLLV   | 0              |
| 52           | VH6       | IGHV6                                                             | ISPDADFY    | VL1       | V1-11, IGLV1-36*01                 | AAWDDSLPWIV | 0              |
| 36           | VH6       | IGHV6                                                             | PRRLSFDY    | VL1       | L8, IGKV1-9*01                     | LQDYNYPPDT  | 0              |
| 128          | VH6       | IGHV6                                                             | PRRLSFDY    | VL1       | L8, IGKV1-9*01                     | LQITTRLIRS  | 0              |
| 81           | VH6       | IGHV6                                                             | SIRVSFDY    | VL1       | L15, IGKV1D-16*01                  | LQGYNYHWT   | 0              |
| 17           | VH6       | IGHV6                                                             | VSWYSFDY    | VL2       | A7, IGKV2D-24*01                   | TQATQYPAT   | 0              |
| 134          | VH6       | IGHV6                                                             | AKFT        | VL3       | V2-1, IGLV3-1*01                   | QAWDSSTFVFG | 0              |
| 57           | VH4       | DP-71/3d179d...+, VH4-59, IGHV4-39*09                             | DLRPG       | VL3       | L25, IGKV3/OR2-268*02, IGKV3D-7*01 | QOYDNLRT    | 0              |
| 99           | VH3       | DP-31/V3-9P...+, VH3-9, IGHV3-9*01                                | QWMSVWR     | VL1       | L8, IGKV1-9*01                     | QQLNSYPRSX  | 0              |
| 115          | VH3       | DP-39/HC16-8...                                                   | CWNSNGLLFS  | VL1       | 08, 018, IGKV1D-33*01, IGKV1-33*01 | QOYGNLPT    | 0              |
| 148          | VH1       | DP-15/VI-8+, VH1-8, IGHV1-8*01                                    | CISVRSS     | VL2       | A1, IGKV2D-30*01                   | MQGTHWRSAT  | 0              |
| 159          | VH1       | COS-14/HC15-5                                                     | RRKFQ       | VL3       | L25, IGKV3/OR2-268*02, IGKV3D-7*01 | QOYDNLTT    | 0              |
| 146          | VH1       | DP-14/VI-18+, VH1-18, IGHV1-18*01                                 | DKEHCLNVYL  | VL3       | A27, IGKV3-20*01                   | QOYSSSOFT   | 0              |
| 158          | VH1       | hv1f10t, DP-7/21-2...+, VH1-46, IGHV1-46*03, IGHV1-46*01          | HNRPMFDY    | VL3       | V2-1, IGLV3-1*01                   | QAWDSSSRFV  | 0              |
