# Supplementary material for: CARbodies: Human Antibodies Against Cell Surface Tumor Antigens Selected From Repertoires Displayed on T Cell Chimeric Antigen Receptors
Source: PubMed Central journal article supplement — Mol Ther Nucleic Acids. 2013 May 21;2(5):e93–. doi: 10.1038/mtna.2013.19 (PMC4817937; doi:10.1038/mtna.2013.19), 2013-05-21
Supplement: mtna201319x9.pdf [file mtna201319x9.pdf]

Table S6. V gene usage and deduced aminoacid sequences of CDR3 after three round of activation/selection on HeLa cells.

| Clone No | VH Family | VH Gene                           | VH CDR3    | VL Family | VL Gene            | VL CDR3     | N° repetitions |
|----------|-----------|-----------------------------------|------------|-----------|--------------------|-------------|----------------|
| 45       | VH1       | DP-10/hv1051...+, IGHV1-69*01     | LYPPT      | VL1       | V1-16, IGLV1-44*01 | AAWGDRL     | 3              |
| 96       | VH7       | VI-4.1b+, IGHV7-4-1*02            | PDVDTGLGRE | VL1       | V1-16, IGLV1-44*01 | AAWDDSL     | 2              |
| 65       | VH7       | VI-4.1b+, IGHV7-4-1*02            | PDVDTGLGRE | VL1       | V1-17, IGLV1-47*02 | AAWDDSLQTG  | 0              |
| 196      | VH7       | VI-4.1b+, IGHV7-4-1*02            | TFSRTHQV   | VL1       | IGLV1-47*01        | AVGPGIRR    | 0              |
| 88       | VH7       | VI-4.1b+, IGHV7-4-1*02            | ALHRGEN    | VL8       | V3-4, IGLV8-61*01  | VLYMGSS     | 5              |
| 3        | VH1       | DP-14/V1-18+, VH1-18, IGHV1-18*01 | RVKHT      | VL2       | A17, IGKV2-30*01   | MQGTHWRVF   | 2              |
| 170      | VH1       | DP-14/V1-18+, VH1-18, IGHV1-18*01 | TDWSL      | VL1       | L15, IGKV1D-16*01  | QQYNSYPT    | 4              |
| 26       | VH1       | DP-1/HC15-1                       | TSATR      | VL2       | A2, IGKV2D-29*01   | MQSIQLP     | 5              |
| 47       | VH1       | DP-5/V1-24P+, VH1-24, IGHV1-24*01 | SMSADGK    | VL9       | IGLV9-49*01        | GADHGSGSNFC | 0              |
| 5        | VH1       | DP-2/V71-5+, IGHV1-58*01          | TGYKFAGKY  | VL2       | V1-4, IGLV2-14*01  | SSYTSSS     | 26             |
| 219      | VH1       | DP-10/hv1051...+, IGHV1-69*01     | FSTGTFFN   | VL1       | L24, IGKV1D-8*01   | QQYYSFLSST  | 5              |
| 188      | VH1       | DP-10/hv1051...+, IGHV1-69*01     | SRPPA      | VL1       | L8, IGKV1-9*01     | QQLNSYHVAT  | 0              |
| 177      | VH1       | DP-10/hv1051...+, IGHV1-69*01     | FSTGTFFN   | VL2       | V1-9, IGLV2-33*01  | SLYSSSY     | 0              |
| 38       | VH6       | IGHV6                             | SRPPA      | VL1       | L8, IGKV1-9*01     | QQLNSYHVA   | 0              |
| 163      | VH1       | DP-75/VI-2...+, VH1-2, IGHV1-2*02 | VTGDASF    | VL1       | IGLV1-47*01        | AAWDDSL     | 2              |
| 128      | VH3       | DP-58/hv3d1EG, IGHV3-48*03        | DSNVTPA    | VL1       | IGKV1              | LQHDSYLCT   | 0              |
