# Supplementary figures and images for: CARbodies: Human Antibodies Against Cell Surface Tumor Antigens Selected From Repertoires Displayed on T Cell Chimeric Antigen Receptors
Source: PubMed Central journal article supplement — Mol Ther Nucleic Acids. 2013 May 21;2(5):e93–. doi: 10.1038/mtna.2013.19 (PMC4817937; doi:10.1038/mtna.2013.19), 2013-05-21

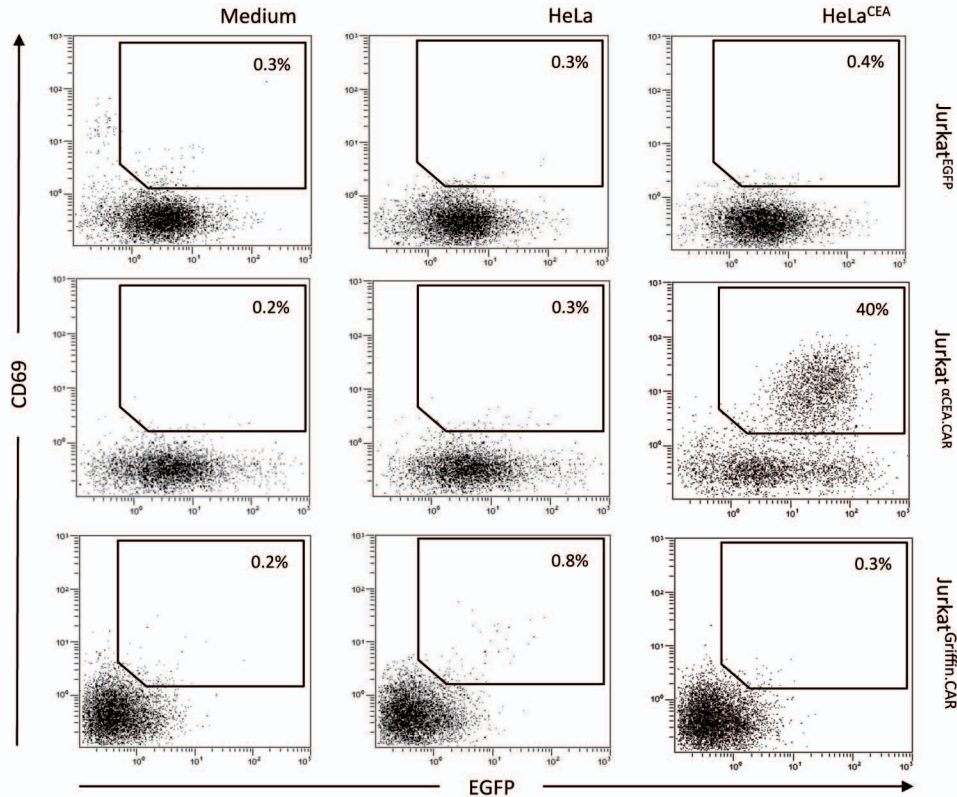

Supplementary Figure 1. Alonso-Camino *et al.*

Supplement: mtna201319x1.pdf [file mtna201319x1.pdf]

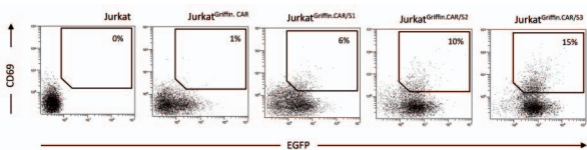

Supplementary Figure 2. Alonso-Camino et al.

Supplement: mtna201319x2.pdf [file mtna201319x2.pdf]

**(a)**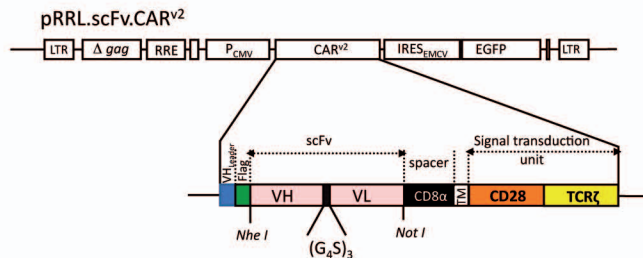**(b)**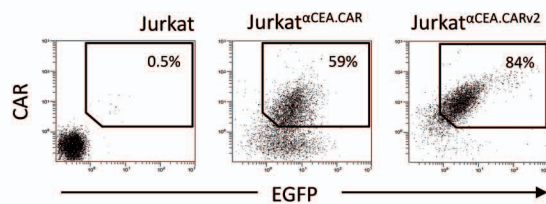**(c)**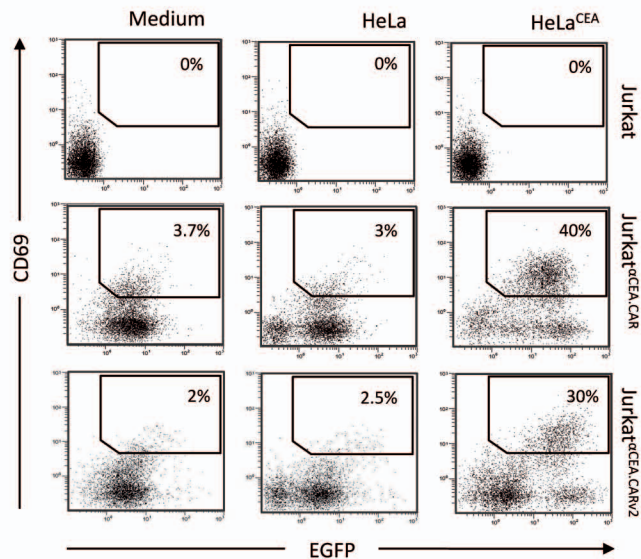

Supplement: mtna201319x3.pdf [file mtna201319x3.pdf]
